# Supplementary material for: A glucose-responsive insulin therapy protects animals against hypoglycemia
Source: JCI journal article supplement (doi:10.1172/jci.insight.97476), 2018-01-10
Supplement: sd1 [file 1]

## Supplemental Data

Figure S1

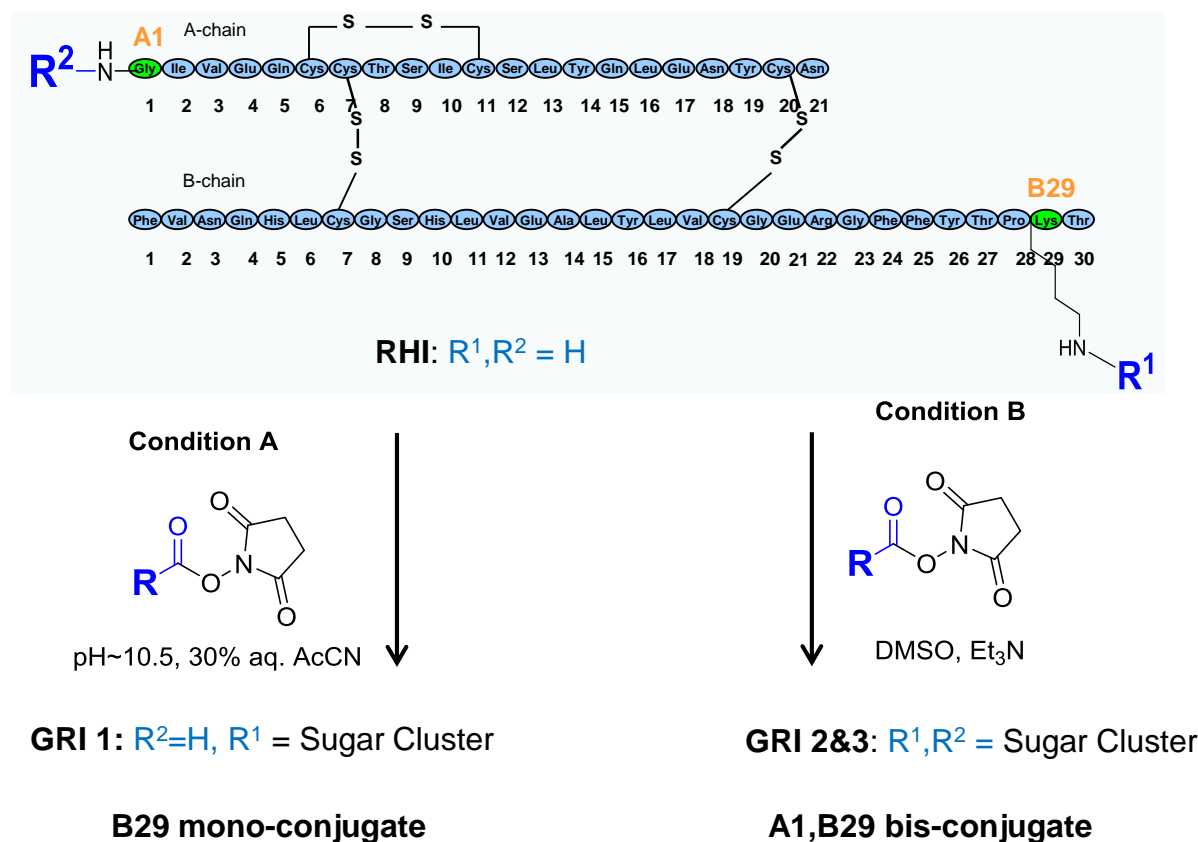

Figure S1. GRI Synthesis Scheme 1

GRI1, GRI2 and GRI3 can be synthesized under anhydrous conditions or aqueous conditions, leading to A1, B29 bis-conjugation and B29 mono-conjugation, respectively (see **Figure 1A** for structures of sugar clusters)

**Figure S2**

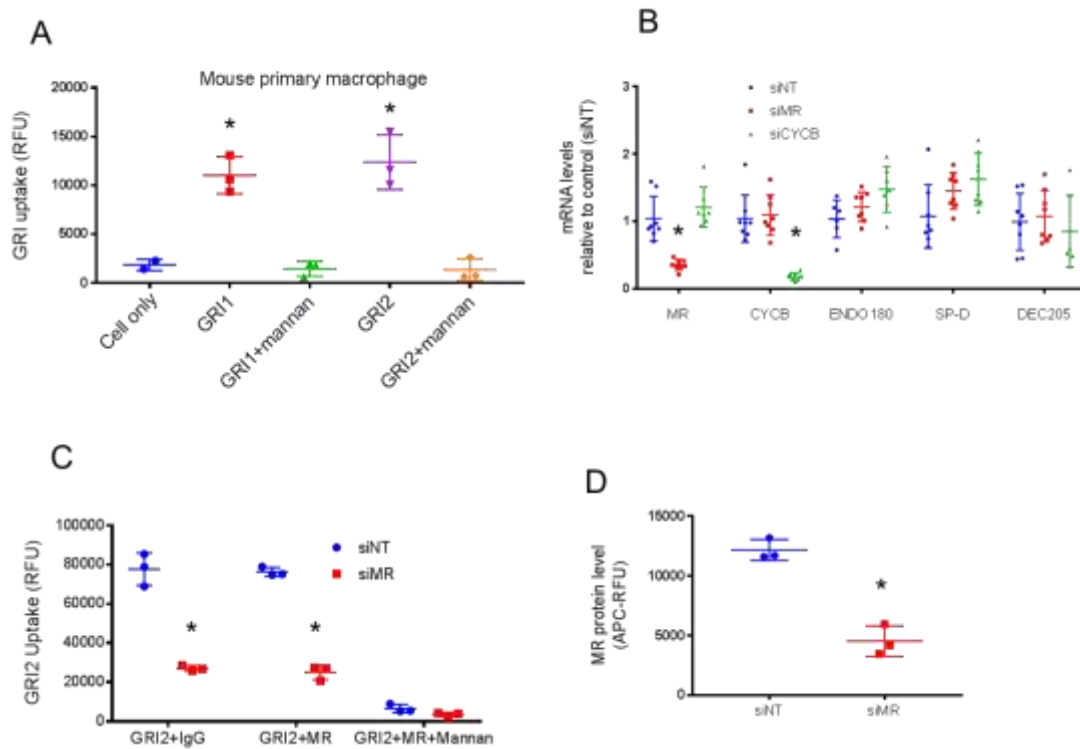

**Figure S2. GRI Uptake Mediated by MR in Macrophage Cells**

(A) GRI1 and GRI2 uptake assay was performed in primary mouse macrophages by MCSF-induced monocytes differentiation. N=2-3 per group. \* $p < 0.05$  Corresponding GRI vs. GRI + mannan by Student's T test. (B) Knockdown of mannose receptor by siRNA did not change levels of other lectins in rat NR8383 macrophages. N=6-8 per group. \* $p < 0.05$  vs. siRNA control (siNT) by Student's T test. (C-D) GRI2 uptake assay in response to siRNA induced mannose receptor knockdown was performed in human primary macrophages by MCSF-induced monocytes differentiation. Human MR siRNA transfection resulted in a 60% reduction of MR membrane levels compared to non-targeting siRNA control, and this corresponded to a 70% reduction of GRI2 uptake. Membrane MR levels were measured by flow cytometry using APC-

labeled MR antibodies. N=3 per group. \* $p < 0.05$  vs. siRNA control (siNT) by Student's T test.

Results are shown as mean  $\pm$  SD of values and represent 2-3 independent experiments.
